# Supplementary material for: Development of a cerebellar ataxia diagnosis model using conditional GAN-based synthetic data generation for visuomotor adaptation task
Source: PubMed Central journal article supplement — BMC Med Inform Decis Mak. 2024 Nov 12;24:336. doi: 10.1186/s12911-024-02720-y (PMC11555814; doi:10.1186/s12911-024-02720-y), 2024-11-12
Supplement: 12911_2024_2720_MOESM1_ESM.pdf [file 12911_2024_2720_MOESM1_ESM.pdf]

**Table 1** Configuration used in Exp.1-4 with 80-20 ratio training-test random data samples for real data

|        | Training                                                                                                                                                                                      | Test                                                   |
|--------|-----------------------------------------------------------------------------------------------------------------------------------------------------------------------------------------------|--------------------------------------------------------|
| Exp-1. | A03, A04, A05, A07, A08, A09, A10, A11,<br>P09, P10, P12, P13, P14, P15, P17, P19, P20, P21, P22, P23,<br>Y07, Y09, Y10, Y11, Y12, Y13, Y14, Y15, Y16, Y17, Y18, Y19, Y20, Y22, Y23           | A01, A02,<br>P05, P06, P07, P08,<br>Y01, Y03, Y04, Y06 |
| Exp-2. | A01, A02, A05, A07, A08, A09, A10, A11,<br>P05, P06, P07, P08, P14, P15, P17, P19, P20, P21, P22, P23,<br>Y01, Y03, Y04, Y06, Y12, Y13, Y14, Y15, Y16, Y17, Y18, Y19, Y20, Y22, Y23           | A03, A04,<br>P09, P10, P12, P13,<br>Y07, Y09, Y10, Y11 |
| Exp-3. | A01, A02, A03, A04, A05, A07, A08, A09, A10, A11,<br>P05, P06, P07, P08, P09, P10, P12, P13, P20, P21, P22, P23,<br>Y01, Y03, Y04, Y06, Y07, Y09, Y10, Y11, Y16, Y17, Y18, Y19, Y20, Y22, Y23 | A05, A07,<br>P14, P15, P17, P19,<br>Y12, Y13, Y14, Y15 |
| Exp-4. | A01, A02, A03, A04, A05, A07, A08, A09, A10, A11,<br>P05, P06, P07, P08, P09, P10, P12, P13, P14, P15, P17, P19,<br>Y01, Y03, Y04, Y06, Y07, Y09, Y10, Y11, Y12, Y13, Y14, Y15, Y20, Y22, Y23 | A08, A09,<br>P20, P21, P22, P23,<br>Y16, Y17, Y18, Y19 |

**Table 2** Classification accuracy for Exp.1 with 80-20 ratio training-test random data samples on real data

|          |                              | Test      |                              |
|----------|------------------------------|-----------|------------------------------|
|          |                              | Real data | Real data + Synthesized data |
| Training | Real data                    | 90.00 %   | 96.67 %                      |
|          | Real data + Synthesized data | 94.08 %   | 98.33 %                      |

**Table 3** Classification accuracy for Exp.2 with 80-20 ratio training-test random data samples on real data

|          |                              | Test      |                              |
|----------|------------------------------|-----------|------------------------------|
|          |                              | Real data | Real data + Synthesized data |
| Training | Real data                    | 90.00 %   | 100 %                        |
|          | Real data + Synthesized data | 90.00 %   | 100 %                        |

**Table 4** Classification accuracy for Exp.3 with 80-20 ratio training-test random data samples on real data

|          |                              | Test      |                              |
|----------|------------------------------|-----------|------------------------------|
|          |                              | Real data | Real data + Synthesized data |
| Training | Real data                    | 70.00 %   | 90.00 %                      |
|          | Real data + Synthesized data | 98.00 %   | 100 %                        |

**Table 5** Classification accuracy for Exp.4 with 80-20 ratio training-test random data samples on real data

|          |                              | Test      |                              |
|----------|------------------------------|-----------|------------------------------|
|          |                              | Real data | Real data + Synthesized data |
| Training | Real data                    | 80.00 %   | 96.67 %                      |
|          | Real data + Synthesized data | 90.00 %   | 100 %                        |
